# Supplementary material for: The Identification of a Novel Spider Toxin Peptide, Lycotoxin-Pa2a, with Antibacterial and Anti-Inflammatory Activities
Source: MDPI journal article supplement (doi:10.3390/antibiotics12121708), 2023-12-07
Supplement: s1 [file s1]

## Supplementary material

### Identification of a novel spider toxin peptide, Lycotoxin-Pa2a, with antibacterial and anti-inflammatory activities

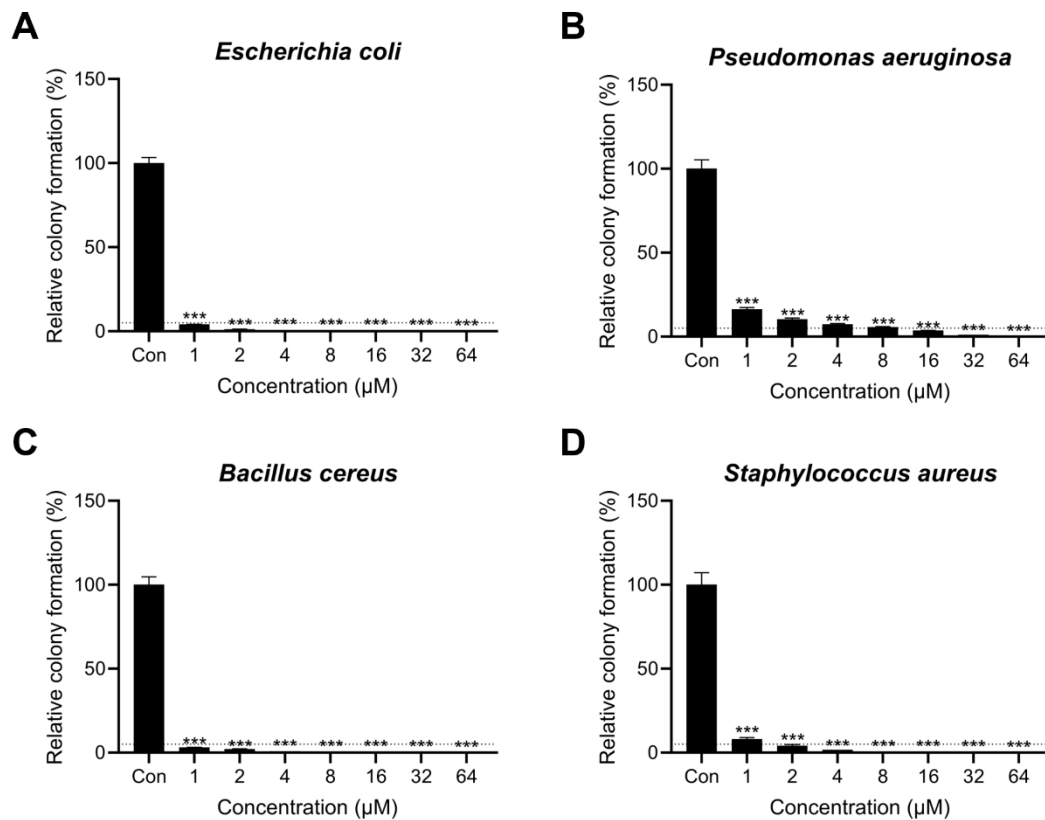

**Supplementary Figure S1.** Antimicrobial activity of melittin on pathogenic bacteria. Colony forming assay was conducted on (A) *Escherichia coli*, (B) *Pseudomonas aeruginosa*, (C) *Bacillus cereus*, and (D) *Staphylococcus aureus*. The dotted line is drawn at 5% of relative colony formation. \*\*\*  $p < 0.001$  indicated a significant difference compared with the control.
